# Supplementary material
Source: PubMed Central journal article supplement (PMC7960336)
Supplement: 15-01172.pdf [file 15-01172.pdf]

**On-line Table: Demographic and clinical features in 8 patients with atypical SIH**

| Case No. | Sex | Age at Onset/<br>Symptom Duration | Follow-Up (mo) | Orthostatic Headache | Dysarthria           | Dysphagia   | Gait Disturbance                  | Movement Disorder                 | Cognitive Deficit                                                                                         | Behavior                                               | Hypersomnia | Treatment                                                                                      |
|----------|-----|-----------------------------------|----------------|----------------------|----------------------|-------------|-----------------------------------|-----------------------------------|-----------------------------------------------------------------------------------------------------------|--------------------------------------------------------|-------------|------------------------------------------------------------------------------------------------|
| 1        | M   | 51yr/48 mos                       | No             | No                   | No                   | No          | No                                | No                                | Executive and verbal memory impairments, less impairment in spatial memory                                | Moderate disinhibition, impulsivity, attention deficit | Yes         | No follow-up                                                                                   |
| 2        | M   | 48 yr/12 mos                      | 25             | Mild                 | No                   | No          | No                                | Face and upper body tics          | Deficits in speed of information processing, cognitive efficiency, and executive functions                | Disinhibition and apathy                               | Yes         | Died from MI; postmortem findings negative for FTD                                             |
| 3        | M   | 57 yr/36 mos                      | 46             | Mild                 | Yes, severe          | Yes, severe | Yes, gait ataxia, imbalance       | Tics, facial grimacing            | Nonfocal deficits in mental efficiency (processing speed, attention/concentration, and acquisition)       | Disinhibition                                          | Yes         | Transient improvement with spinal patches and saline infusions, resolved with spinal operation |
| 4        | F   | 67 yr/24 mos                      | 50             | Yes                  | Yes, scanning speech | No          | Yes, unsteady                     | Facial grimacing                  | Short-term memory symptoms                                                                                | Disinhibition, inappropriate laughter                  | Yes         | Transient improvement with thoracic cyst ligation, decreased stable                            |
| 5        | M   | 30 yr/18 mos                      | 58             | Yes                  | Yes                  | Yes         | Wide-based staggering gait, falls | Resting tremor, right UE and head | No                                                                                                        | Normal                                                 | No          | Chiari decompression, stable                                                                   |
| 6        | M   | 64 yr/24 mos                      | 7              | Yes                  | No                   | No          | No                                | No                                | Severe impairment of anterograde verbal and visual memory                                                 | Normal                                                 | Yes         | Improved with targeted blood patches                                                           |
| 7        | F   | 76 yr/1 mo                        | 1              | Yes, severe          | No                   | Yes         | Yes, falls                        | No                                | Anterograde memory deficit; confusion                                                                     | Nonresponsiveness, fluctuating                         | Yes         | Deceased                                                                                       |
| 8        | F   | 51yr/2 wk                         | III            | Yes                  | No                   | No          | Yes, falls                        | No                                | Severely impaired on phonemic fluency, confrontation naming, verbal memory, and perceptual discrimination | Normal                                                 | Yes         | Improved after burr-hole with resolution of sagging                                            |

**Note:**—UE indicates upper extremity; FTD, frontotemporal dementia; MI, myocardial infarction.
